# Supplementary material for: Metal-N4@Graphene as Multifunctional Anchoring Materials for Na-S Batteries: First-Principles Study
Source: MDPI journal article supplement (doi:10.3390/nano11051197), 2021-05-01
Supplement: s1 [file s1]

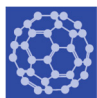

## Supplementary Materials

Metal-N<sub>4</sub>@Graphene as Multifunctional Anchoring Materials for Na-S Batteries: First-Principles Study

Kaishuai Yang <sup>1</sup>, Dayong Liu <sup>2</sup>, Yiling Sun <sup>1,\*</sup>, Zhengfang Qian <sup>1</sup>, Shengkui Zhong <sup>3</sup> and Renheng Wang <sup>1,\*</sup>

<sup>1</sup> Key Laboratory of Optoelectronic Devices and Systems of Ministry of Education and Guangdong Province, College of Physics and Optoelectronic Engineering, Shenzhen University, Shenzhen 518060, China; ksyang@szu.edu.cn (K.Y.); zq001@szu.edu.cn (Z.Q.)

<sup>2</sup> Key Laboratory of Materials Physics, Institute of Solid State Physics, HFIPS, Chinese Academy of Sciences, Hefei 230031, China; dylu@theory.issp.ac.cn

<sup>3</sup> School of Marine Science and Technology, Hainan Tropical Ocean University, Hainan 572000, China; zskui74@163.com

\* Correspondence: sunyl@szu.edu.cn (Y.S.); wangrh@szu.edu.cn (R.W.)

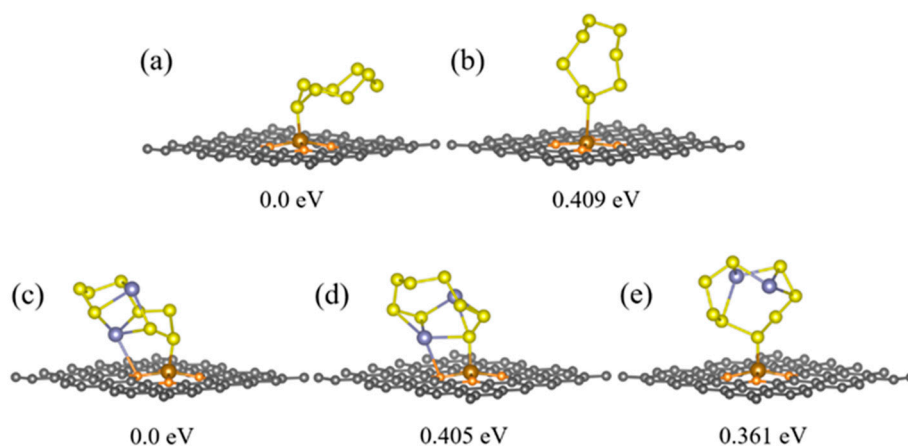

**Figure S1.** Different optimized adsorption configurations of cyclo-S<sub>8</sub> [(a) and (b)] and Na<sub>2</sub>S<sub>8</sub> [(c), (d), and (e)] species adsorbed on the surface of Fe-N<sub>4</sub>@graphene. Their corresponding energies are given below them, and the lowest adsorption energy was set to 0 eV. The black, blue, yellow, orange, and brown balls represent carbon, sodium, sulfur, nitrogen, and iron atoms, respectively.

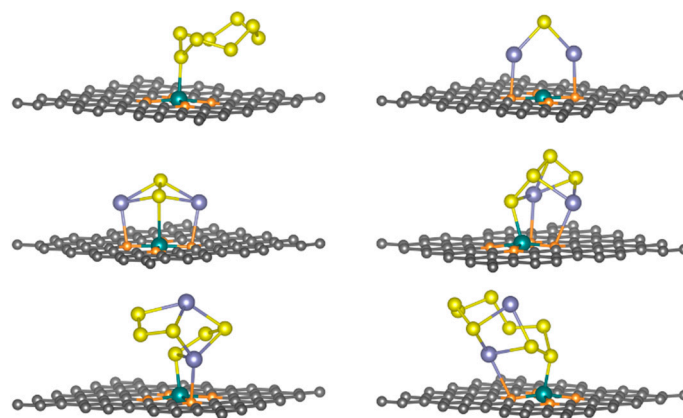

**Figure S2.** The optimized structures of cyclo-S<sub>n</sub> and Na<sub>2</sub>S<sub>n</sub> (n = 1, 2, 4, 6, and 8) species adsorbed on the surface of Co-N<sub>4</sub>@graphene. The black, blue, yellow, orange, and indigo balls represent carbon, sodium, sulfur, nitrogen, and cobalt atoms, respectively.

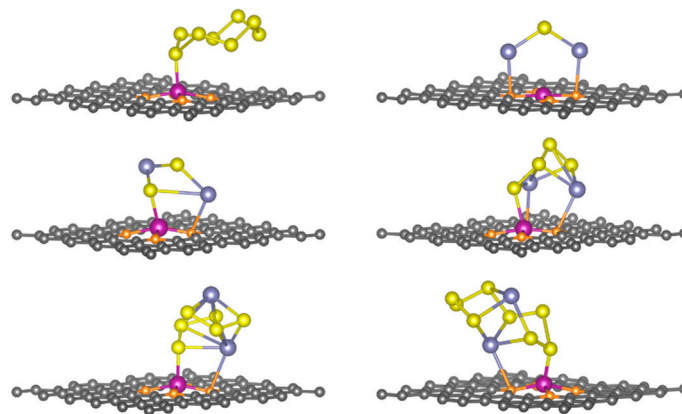

**Figure S3.** The optimized structures of cyclo-S<sub>8</sub> and Na<sub>2</sub>Sn ( $n = 1, 2, 4, 6$ , and  $8$ ) species adsorbed on the surface of Mn-N<sub>4</sub>@graphene. The black, blue, yellow, orange, and magenta balls represent carbon, sodium, sulfur, nitrogen, and manganese atoms, respectively.

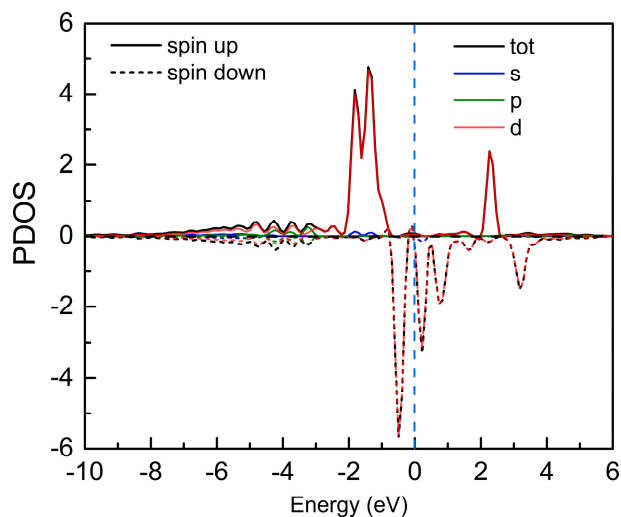

**Figure S4.** The projected density of states (PDOS) of the doped transition-metal iron. The solid and dashed lines represent spin-up and spin-down component of PDOS, respectively. The vertical blue dashed line represents the Fermi-energy level. The total PDOS near the Fermi-energy level mainly comes from the  $d$  orbital.

**Table S1.** The average bond length  $d$  (Å) and magnetic moment  $M$  ( $\mu_B$ ) of transition metal-N<sub>4</sub>@graphene substrates. The subscript X stands for the C, N, Fe, Co, and Mn atom, respectively.

| Metal-N <sub>4</sub> @G | C     | N     | Fe    | Co    | Mn    |
|-------------------------|-------|-------|-------|-------|-------|
| $d_{X-N}$               | -     | -     | 1.898 | 1.894 | 1.929 |
| $d_{X-C}$               | 1.430 | 1.390 | -     | -     | -     |
| $M$                     | 0.002 | 0.030 | 1.799 | 1.123 | 0.638 |

**Table S2.** The adsorption energies  $E_{ad}$  (eV), average bond length  $d$  (Å), and the minimum distance  $d_{min}$  (Å) between  $Na_2S_n$  species and pristine graphene.

| Graphene   | $Na_2S$ | $Na_2S_2$ | $Na_2S_4$ | $Na_2S_6$ | $Na_2S_8$ | cyclo- $S_8$ |
|------------|---------|-----------|-----------|-----------|-----------|--------------|
| $E_b$      | 0.776   | 1.004     | 0.626     | 0.529     | 0.464     | 0.742        |
| $d_{Na-S}$ | 2.536   | 2.668     | 2.745     | 2.752     | 2.749     | -            |
| $d_{S-S}$  | -       | 2.156     | 2.130     | 2.104     | 2.131     | 2.097        |
| $d_{min}$  | 2.826   | 2.871     | 2.794     | 3.291     | 2.850     | 4.001        |

**Table S3.** The adsorption energies  $E_{ad}$  (eV) and average bond length  $d$  (Å) of  $Na_2S_n$  species and cyclo- $S_8$  after adsorbing on Co- $N_4$ @graphene.

| Co- $N_4$ @G | $Na_2S$ | $Na_2S_2$ | $Na_2S_4$ | $Na_2S_6$ | $Na_2S_8$ | cyclo- $S_8$ |
|--------------|---------|-----------|-----------|-----------|-----------|--------------|
| $E_b$        | 0.972   | 1.127     | 0.856     | 1.027     | 0.924     | 0.798        |
| $d_{Na-N}$   | 2.580   | 2.820     | 2.764     | 2.690     | 2.906     | -            |
| $d_{Co-S}$   | -       | 2.496     | 2.484     | 2.354     | 2.312     | 2.472        |
| $d_{Na-S}$   | 2.589   | 2.670     | 2.738     | 2.789     | 2.785     | -            |
| $d_{S-S}$    | -       | 2.166     | 2.132     | 2.064     | 2.170     | 2.147        |

**Table S4.** The adsorption energies  $E_{ad}$  (eV) and average bond length  $d$  (Å) of  $Na_2S_n$  species and cyclo- $S_8$  after adsorbing on Mn- $N_4$ @graphene.

| Mn- $N_4$ @G | $Na_2S$ | $Na_2S_2$ | $Na_2S_4$ | $Na_2S_6$ | $Na_2S_8$ | cyclo- $S_8$ |
|--------------|---------|-----------|-----------|-----------|-----------|--------------|
| $E_b$        | 0.974   | 1.205     | 1.026     | 0.605     | 0.766     | 0.837        |
| $d_{Na-N}$   | 2.625   | 2.524     | 2.769     | 2.797     | 2.882     | --           |
| $d_{Mn-S}$   | --      | 2.289     | 2.456     | 2.218     | 2.137     | 2.252        |
| $d_{Na-S}$   | 2.509   | 2.612     | 2.702     | 2.870     | 2.831     | --           |
| $d_{S-S}$    | --      | 2.204     | 2.134     | 2.104     | 2.178     | 2.111        |
